# Supplementary material for: Cyclin-dependent kinase pathway aberrations in diverse malignancies: clinical and molecular characteristics
Source: PubMed Central journal article supplement — Cell Cycle. 2015 Feb 19;14(8):1252–9. doi: 10.1080/15384101.2015.1014149 (PMC4614867; doi:10.1080/15384101.2015.1014149), 2015-02-19

Table 1. Clinical characteristics of 347 patients with CDK4/6, CDKN2A/B aberrations (univariate analysis)

| <b>Patient characteristics<br/>(N=347)</b>        | <b>Aberrant<br/>CDK4/6, DKN2A/B<br/>N=79 (%)</b> | <b>Normal<br/>CDK4/6, CDKN2A/B<br/>N=268 (%)</b> | <b>p-value*</b>    |
|---------------------------------------------------|--------------------------------------------------|--------------------------------------------------|--------------------|
| <b>Gender</b>                                     |                                                  |                                                  | <b>0.026</b>       |
| Women (N=196)                                     | 36 (18.4%)                                       | 160 (81.6%)                                      |                    |
| Men (N=151)                                       | 43 (28.5%)                                       | 108 (71.5%)                                      |                    |
| <b>Age at diagnosis</b>                           |                                                  |                                                  | 0.13               |
| Age ≥ 50 years (N=212)                            | 54 (25.5%)                                       | 158 (74.5%)                                      |                    |
| Age <50 years (N=135)                             | 25 (18.5%)                                       | 110 (81.5%)                                      |                    |
| <b>Types of cancer diagnosis<sup>§</sup></b>      |                                                  |                                                  |                    |
| Breast (N=74)                                     | 7 (9.5%)                                         | 67 (90.5%)                                       | <b>0.0021</b>      |
| Glioblastoma (N=26)                               | 21 (80.8%)                                       | 5 (19.2%)                                        | <b>&lt; 0.0001</b> |
| Colorectal (N=26)                                 | 0 (0%)                                           | 26 (100%)                                        | <b>0.004</b>       |
| Lung (N=23)                                       | 6 (26.1%)                                        | 17 (73.9%)                                       | 0.69               |
| Melanoma (N=23)                                   | 8 (34.8%)                                        | 15 (65.2%)                                       | 0.16               |
| Appendix (N=20)                                   | 1 (5.0%)                                         | 19 (95.0%)                                       | 0.27               |
| <b>Site of metastasis<br/>(N=280)<sup>¶</sup></b> | <b>Aberrant<br/>CDK4/6, DKN2A/B<br/>N=50 (%)</b> | <b>Normal<br/>CDK4/6, CDKN2A/B<br/>N=230 (%)</b> |                    |
| Lymph node metastasis                             |                                                  |                                                  | 0.73               |
| Yes (N=145)                                       | 27 (18.6%)                                       | 118 (81.4%)                                      |                    |
| No (N=135)                                        | 23 (17.0%)                                       | 112 (83.0%)                                      |                    |
| Liver metastasis                                  |                                                  |                                                  | 0.74               |
| Yes (N=101)                                       | 17 (16.8%)                                       | 84 (83.2%)                                       |                    |
| No (N=179)                                        | 33 (18.4%)                                       | 146 (81.6%)                                      |                    |
| Bone metastasis                                   |                                                  |                                                  | 0.36               |
| Yes (N=82)                                        | 12 (14.6%)                                       | 70 (85.4%)                                       |                    |
| No (N=198)                                        | 38 (19.2%)                                       | 160 (80.8%)                                      |                    |
| Lung metastasis                                   |                                                  |                                                  | 0.23               |
| Yes (N=81)                                        | 11 (13.6%)                                       | 70 (86.4%)                                       |                    |
| No (N=199)                                        | 39 (19.6%)                                       | 160 (80.4%)                                      |                    |
| Omentum/Peritoneum metastasis                     |                                                  |                                                  | 0.92               |
| Yes (N=49)                                        | 9 (18.4%)                                        | 40 (81.6%)                                       |                    |
| No (N=231)                                        | 41(17.8%)                                        | 190 (82.2%)                                      |                    |
| Brain metastasis                                  |                                                  |                                                  | 0.16               |
| Yes (N=34)                                        | 9 (26.5%)                                        | 25 (73.5%)                                       |                    |
| No (N=246)                                        | 41(16.7%)                                        | 205 (83.3%)                                      |                    |
| Soft tissue metastasis                            |                                                  |                                                  | 0.21               |
| Yes (N=31)                                        | 3 (9.7%)                                         | 28 (90.3%)                                       |                    |
| No (N=249)                                        | 47 (18.9%)                                       | 202 (81.1%)                                      |                    |
| Adrenal metastasis                                |                                                  |                                                  | 0.51               |
| Yes (N=12)                                        | 3 (25.0%)                                        | 9 (75.0%)                                        |                    |
| No (N=268)                                        | 47 (17.5%)                                       | 221 (82.5%)                                      |                    |
| Site of biopsies                                  |                                                  |                                                  | 0.83               |
| Primary (N=125)                                   | 23 (18.4%)                                       | 102 (81.6%)                                      |                    |
| Metastases (N=155)                                | 27 (17.4%)                                       | 128 (82.6%)                                      |                    |

\* p-values are from Fisher's exact test.

§ Included characteristics with N ≥ 20 of primary cancer diagnosis. See supplemental table 1 for complete list of characteristics with N <20.

¶ Excluded patients with hematological malignancy (N=21) and CNS tumors (N=46). Reported here with site of metastasis with N ≥ 10.

Table 2. CDK4/6 or CDKN2A/B abnormality and types of co-existing genetic aberrations (univariate analysis)

| <b>Patient characteristics<br/>(N=347)</b>                  | <b>Aberrant<br/>CDK4/6,<br/>CDKN2A/B<br/>N=79 (%)</b> | <b>Normal<br/>CDK4/6,<br/>CDKN2A/B<br/>N=268 (%)</b> | <b>p-value*</b>    |
|-------------------------------------------------------------|-------------------------------------------------------|------------------------------------------------------|--------------------|
| <b>Types of co-existing genetic aberrations<sup>§</sup></b> |                                                       |                                                      |                    |
| <b>TP53</b>                                                 |                                                       |                                                      | 0.28               |
| Wild-type (N=194)                                           | 40 (20.6%)                                            | 154 (79.4%)                                          |                    |
| Aberrant (N=153)                                            | 39 (25.5%)                                            | 114 (74.5%)                                          |                    |
| <b>KRAS</b>                                                 |                                                       |                                                      | <b>0.02</b>        |
| Wild-type (N=292)                                           | 73 (25.0%)                                            | 219 (75.0%)                                          |                    |
| Aberrant (N=55)                                             | 6 (10.9%)                                             | 49 (89.1%)                                           |                    |
| <b>FGFR/FGF</b>                                             |                                                       |                                                      | 0.11               |
| Wild-type (N=296)                                           | 63 (21.3%)                                            | 233 (78.7%)                                          |                    |
| Aberrant (N=51)                                             | 16 (31.4%)                                            | 35 (68.6%)                                           |                    |
| <b>PIK3CA</b>                                               |                                                       |                                                      | <b>0.01</b>        |
| Wild-type (N=307)                                           | 76 (24.8%)                                            | 231 (75.2%)                                          |                    |
| Aberrant (N=40)                                             | 3 (7.5%)                                              | 37 (92.5%)                                           |                    |
| <b>PTEN</b>                                                 |                                                       |                                                      | 0.96               |
| Wild-type (N=308)                                           | 70 (22.7%)                                            | 238 (77.3%)                                          |                    |
| Aberrant (N=39)                                             | 9 (23.1%)                                             | 30 (76.9%)                                           |                    |
| <b>MYC</b>                                                  |                                                       |                                                      | 0.24               |
| Wild-type (N=311)                                           | 68 (21.9%)                                            | 243 (78.1%)                                          |                    |
| Aberrant (N=36)                                             | 11 (30.6%)                                            | 25 (69.4%)                                           |                    |
| <b>EGFR</b>                                                 |                                                       |                                                      | <b>&lt; 0.0001</b> |
| Wild-type (N=321)                                           | 59 (18.4%)                                            | 262 (81.6%)                                          |                    |
| Aberrant (N=26)                                             | 20 (76.9%)                                            | 6 (23.1%)                                            |                    |
| <b>CCND1</b>                                                |                                                       |                                                      | 0.52               |
| Wild-type (N=322)                                           | 72 (22.4%)                                            | 250 (77.6%)                                          |                    |
| Aberrant (N=25)                                             | 7 (28.0%)                                             | 18 (72.0%)                                           |                    |
| <b>APC</b>                                                  |                                                       |                                                      | <b>0.03</b>        |
| Wild-type (N=324)                                           | 78 (24.1%)                                            | 246 (75.9%)                                          |                    |
| Aberrant (N=23)                                             | 1 (4.4%)                                              | 22 (95.7%)                                           |                    |
| <b>MCL1</b>                                                 |                                                       |                                                      | 1.00               |
| Wild-type (N=325)                                           | 74 (22.8%)                                            | 251 (77.2%)                                          |                    |
| Aberrant (N=22)                                             | 5 (22.7%)                                             | 17 (77.3%)                                           |                    |
| <b>NF1</b>                                                  |                                                       |                                                      | 1.00               |
| Wild-type (N=325)                                           | 74 (22.8%)                                            | 251 (77.2%)                                          |                    |
| Aberrant (N=22)                                             | 5 (22.7%)                                             | 17 (77.3%)                                           |                    |
| <b>ARID1A</b>                                               |                                                       |                                                      | <b>0.06</b>        |
| Wild-type (N=327)                                           | 71 (21.7%)                                            | 256 (78.3%)                                          |                    |
| Aberrant (N=20)                                             | 8 (40.0%)                                             | 12 (60.0%)                                           |                    |
| <b>BRCA2</b>                                                |                                                       |                                                      | 0.39               |
| Wild-type (N=327)                                           | 76 (23.2%)                                            | 251 (77.2%)                                          |                    |
| Aberrant (N=20)                                             | 3 (15.0%)                                             | 17 (85.0%)                                           |                    |

\* p-values are from Fisher's exact test.

§ Included characteristics with N ≥ 20 of genetic aberration. See supplemental table 1 for complete list of characteristics with N < 20.

Table 3. Multivariate analysis of patient characteristics (N=347) associated with CDK4/6, CDKN2A/B aberrations

| <b>Characteristics</b> | <b>Odds ratio (95% CI)</b> | <b>p-value*</b>    |
|------------------------|----------------------------|--------------------|
| Women                  | 0.92 (0.48-1.76)           | 0.80               |
| Breast                 | 0.39 (0.15-1.02)           | 0.057              |
| Glioblastoma           | 11.2 (3.7-34.5)            | <b>&lt; 0.0001</b> |
| Colorectal             | 0.28 (0.03-2.53)           | 0.26               |
| KRAS aberrant          | 0.59 (0.22-1.57)           | 0.29               |
| PIK3CA aberrant        | 0.56 (0.16-1.96)           | 0.36               |
| EGFR aberrant          | 11.9 (3.92-35.7)           | <b>&lt; 0.0001</b> |
| APC aberrant           | 0.19 (0.02-1.83)           | 0.15               |
| ARID1A aberrant        | 3.98 (1.36-11.8)           | <b>0.01</b>        |

Characteristics selected from table 1 and 2 with p-value <0.1.

\*p-values are from multivariate logistic regression analysis.

P <0.05 was considered to be statistically significant.

Table 4. Clinical outcomes of patients with CDK4/6, CDKN2A/B aberrations (univariate analysis)

| <b>Clinical outcomes</b>                                      | <b>Aberrant<br/>CDK4/6,<br/>CDKN2A/B<br/>Month (range)<br/>N</b> | <b>Normal<br/>CDK4/6,<br/>CDKN2A/B<br/>Month (range)<br/>N</b> | <b>p-value*</b> | <b>Comment</b> |
|---------------------------------------------------------------|------------------------------------------------------------------|----------------------------------------------------------------|-----------------|----------------|
| <b>Median time from diagnosis to metastasis (N=280)</b>       | 17.0 (0-256.7)<br>N=50                                           | 24.2 (0-415.1)<br>N=230                                        | 0.20            | (a)            |
| <b>PFS for first line therapy</b>                             |                                                                  |                                                                |                 |                |
| Median PFS for all first line therapy (N=189)                 | 3.3 (0.6-39.0)<br>N=41                                           | 5.0 (0.5-61.0)<br>N=148                                        | 0.32            | (b)            |
| <b>Subgroup analysis of median PFS for first line therapy</b> |                                                                  |                                                                |                 |                |
| Platinum-containing regimen (N=62)                            | 3.5 (0.6-11.0)<br>N=15                                           | 5.0 (1.0-34.0)<br>N=47                                         | 0.13            | (c)            |
| 5-FU or capecitabine-containing regimen (N=50)                | 5.0 (0.6-11.0)<br>N=11                                           | 5.0 (0.8-21.0)<br>N=39                                         | 0.3             | (d)            |
| Bevacizumab-containing regimen (N=33)                         | 6.5 (2.0-39.0)<br>N=6                                            | 6.5 (1.0-34.0)<br>N=27                                         | 0.43            |                |
| Taxane-containing regimen (N=32)                              | 3.0 (0.6-39.0)<br>N=7                                            | 9.1 (1.0-38.7)<br>N=25                                         | 0.88            | (e)            |

\* p-values are from log-rank test.

(a) Excluded patients with hematological malignancy (N=21) and CNS tumors (N=46).

(b) First line therapy referred to first line after metastatic or recurrent disease (N = 189). Excluded patients with hematological malignancy (N=21). Neoadjuvant/adjuvant therapy was not included (N=56). Chemotherapy was not initiated on 33 patients and 48 patients were not assessable for accurate PFS for first line therapy.

(c) Platinum-containing regimen (N=62): Cisplatin (N=20), carboplatin (N=21) and oxaliplatin (N=21).

(d) 5-FU or capecitabine-containing regimen (N=50): 5-FU (N=30) and capecitabine (N=20)

(e) Taxane-containing regimen (N=32): Paclitaxel (N=22), docetaxel (N=5) and abraxane (N=5).

Table 5. Univariate and multivariate Cox's regression models predicting duration of overall survival in 347 patients with malignancies

| <b>Characteristics<sup>¶</sup><br/>(N=347)</b>     | <b>Hazard<br/>Ratio</b> | <b>95% CI</b> | <b>p-value<sup>*</sup></b> |
|----------------------------------------------------|-------------------------|---------------|----------------------------|
| <b>Gender and age</b>                              |                         |               |                            |
| Women (N=196)                                      | 0.65                    | 0.38-1.04     | <b>0.08</b>                |
| Age $\geq$ 50 years (N=212)                        | 1.21                    | 0.77-1.97     | 0.41                       |
| <b>Types of cancer</b>                             |                         |               |                            |
| Breast (N=74)                                      | 0.64                    | 0.39-1.08     | 0.11                       |
| Glioblastoma (N=26)                                | 3.01                    | 1.73-26.7     | <b>0.006</b>               |
| Colorectal (N=26)                                  | 1.73                    | 0.71-5.93     | 0.19                       |
| Lung (N=23)                                        | 1.16                    | 0.40-3.46     | 0.77                       |
| Melanoma (N=23)                                    | 0.55                    | 0.25-1.48     | 0.29                       |
| Appendix (N=20)                                    | 0.89                    | 0.30-2.67     | 0.84                       |
| <b>Types of genetic aberration</b>                 |                         |               |                            |
| TP53 aberrant (N=153)                              | 2.00                    | 1.27-3.31     | <b>0.004</b>               |
| CDK4/6, CDKN2A/B aberrant (N=79)                   | 2.09                    | 1.35-4.70     | <b>0.004</b>               |
| KRAS aberrant (N=55)                               | 1.24                    | 0.63-2.53     | 0.51                       |
| FGFR/FGF aberrant (N=51)                           | 0.67                    | 0.39-1.26     | 0.24                       |
| PIK3CA aberrant (N=40)                             | 0.76                    | 0.39-1.57     | 0.49                       |
| PTEN aberrant (N=39)                               | 4.02                    | 5.02-31.9     | <b>&lt;0.0001</b>          |
| MYC aberrant (N=36)                                | 1.45                    | 0.71-3.33     | 0.27                       |
| EGFR aberrant (N=26)                               | 2.23                    | 1.07-9.71     | <b>0.04</b>                |
| CCND1 aberrant (N=25)                              | 0.48                    | 0.27-1.21     | 0.15                       |
| APC (N=23)                                         | 1.75                    | 0.65-6.69     | 0.22                       |
| MCL1 aberrant (N=22)                               | 0.49                    | 0.25-1.35     | 0.21                       |
| NF1 aberrant (N=22)                                | 0.74                    | 0.28-2.10     | 0.61                       |
| ARID1A aberrant (N=20)                             | 0.61                    | 0.26-1.65     | 0.38                       |
| BRCA2 aberrant (N=20)                              | 1.09                    | 0.38-3.12     | 0.87                       |
| <b>Multivariate Cox's regression model (N=347)</b> |                         |               |                            |
| Women                                              | 0.60                    | 0.35-1.02     | 0.06                       |
| Glioblastoma                                       | 1.43                    | 0.55-3.72     | 0.46                       |
| TP53 aberrant                                      | 1.92                    | 1.17-3.14     | <b>0.01</b>                |
| CDK4/6, CDKN2A/B aberrant                          | 1.67                    | 0.92-3.04     | 0.09                       |
| PTEN aberrant                                      | 4.83                    | 2.63-8.87     | <b>&lt;0.0001</b>          |
| EGFR aberrant                                      | 1.31                    | 0.54-3.16     | 0.55                       |

¶ Included characteristics with  $N \geq 20$ .

\* p-values (univariate) and hazard ratios with 95% CI are from log-rank test or multivariate Cox's regression model as appropriate.  $p < 0.1$  from univariate analysis were included for multivariate analysis.

## FIGURE LEGEND

### **Figure 1. Frequency of CDK-associated genetic aberrations in 347 patients with diverse malignancies**

Of 347 patients with diverse malignancies, 23% (N=79) had an aberration in either CDK4 (N = 13 [3.7% of 347 patients]), CDK6 (N = 8 [2.3%]), CDKN2A (N = 62 [17.9%]) and/or CDKN2B (N = 37 [10.7%]). All cases with CDKN2B aberrations (N=37) also had aberrant CDKN2A (but the opposite was not true). One case of CDK4 amplification had a co-existing CDKN2A/B aberration. CDK6 amplification occasionally co-existed with CDKN2A/B aberration (N=2) or a CDKN2A aberration (N=1).

**Figure 1.**  
**Frequency of CDK-associated genetic aberrations in 347 patients with advanced Malignancies**

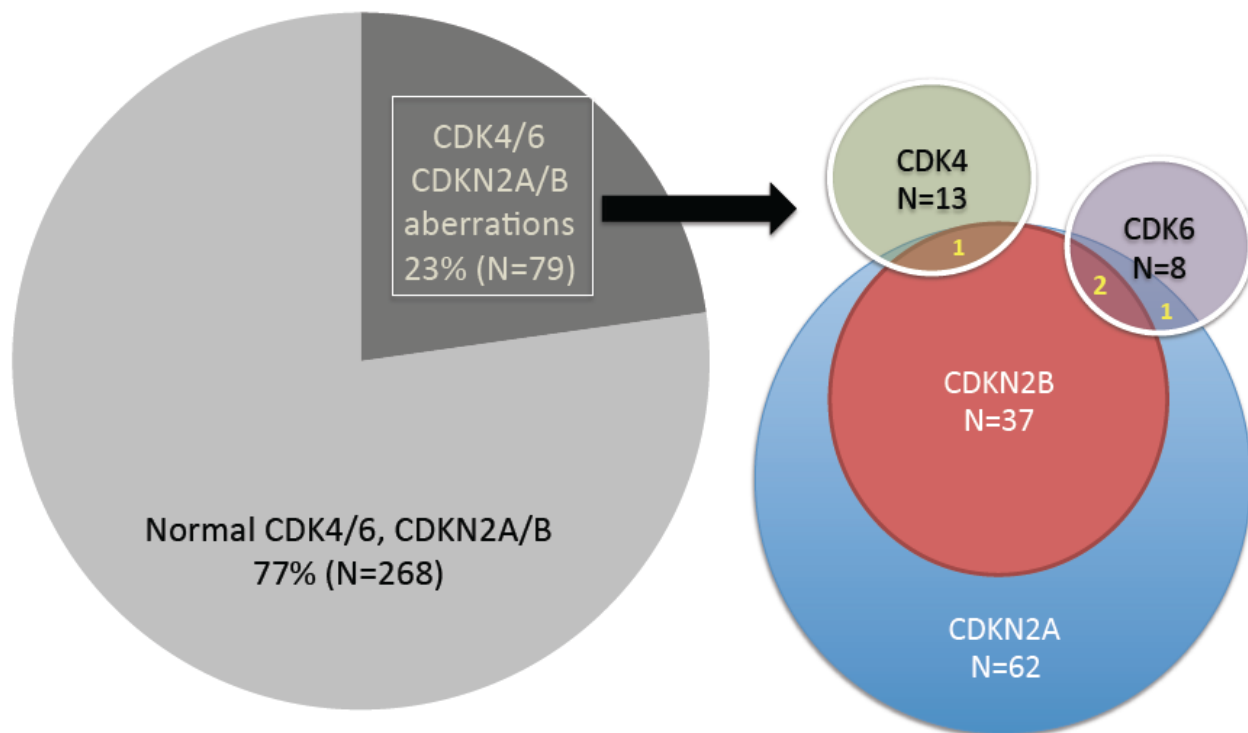

CDKN2A (N = 62): Loss = 48; point mutation = 13; splicing mutation = 1

CDKN2B (N = 37): All due to loss

CDK4/6 (N = 21): All due to amplification

Supplemental Table 1. Univariate analysis of CDK4/6 and CDKN2A/B aberrations among diagnoses or other variables with < 20 of cases

| <b>Characteristics</b><br>N=347                            | <b>Aberrant</b><br><b>CDK4/6,</b><br><b>CDKN2A/B</b><br>N=79 (%) | <b>Normal</b><br><b>CDK4/6,</b><br><b>CDKN2A/B</b><br>N=268 (%) | <b>p-value*</b> |
|------------------------------------------------------------|------------------------------------------------------------------|-----------------------------------------------------------------|-----------------|
| <b>Types of cancer diagnosis</b>                           |                                                                  |                                                                 |                 |
| Head and neck (N=18)                                       | 6 (33.33%)                                                       | 12 (66.67%)                                                     | 0.27            |
| Ovarian (N=10)                                             | 2 (20.00%)                                                       | 8 (80.00%)                                                      | 0.83            |
| Soft tissue/Sarcoma <sup>‡</sup> (N=9)                     | 3 (33.33%)                                                       | 6 (66.67%)                                                      | 0.44            |
| Other <sup>‡</sup> (N=9)                                   | 2 (22.22%)                                                       | 7 (77.78%)                                                      | 0.97            |
| Pancreas (N=8)                                             | 2 (25.00%)                                                       | 6 (75.00%)                                                      | 0.88            |
| Astrocytoma (N=7)                                          | 2 (28.57%)                                                       | 5 (71.43%)                                                      | 0.71            |
| Cholangiocarcinoma (N=7)                                   | 1 (14.29%)                                                       | 6 (85.71%)                                                      | 0.59            |
| Thyroid (N=7)                                              | 1 (14.29%)                                                       | 6 (85.71%)                                                      | 0.59            |
| Gastric (N=6)                                              | 3 (50.00%)                                                       | 3 (50.00%)                                                      | 0.11            |
| Chronic lymphocytic leukemia (N=6)                         | 1 (16.67%)                                                       | 5 (83.33%)                                                      | 0.72            |
| Oligodendroglioma (N=5)                                    | 1 (20.00%)                                                       | 4 (80.00%)                                                      | 0.88            |
| Acute myeloid leukemia (N=5)                               | 0 (0.00%)                                                        | 5 (100.00%)                                                     | 0.22            |
| Carcinoma of unknown primary (N=5)                         | 3 (60.00%)                                                       | 2 (40.00%)                                                      | 0.05            |
| Neuroendocrine (N=5)                                       | 0 (0.00%)                                                        | 5 (100.00%)                                                     | 0.22            |
| Meningioma <sup>¶</sup> (N=4)                              | 2 (50.00%)                                                       | 2 (50.00%)                                                      | 0.19            |
| Lymphoma (N=4)                                             | 1 (25.00%)                                                       | 3 (75.00%)                                                      | 0.91            |
| Myelodysplastic syndrome (N=4)                             | 0 (0.00%)                                                        | 4 (100.00%)                                                     | 0.27            |
| Esophageal (N=4)                                           | 2 (50.00%)                                                       | 2 (50.00%)                                                      | 0.19            |
| Squamous cell carcinoma of skin (N=4)                      | 2 (50.00%)                                                       | 2 (50.00%)                                                      | 0.19            |
| Anal (N=3)                                                 | 0 (0.00%)                                                        | 3 (100.00%)                                                     | 0.34            |
| Cervix (N=3)                                               | 0 (0.00%)                                                        | 3 (100.00%)                                                     | 0.34            |
| Small intestine (N=3)                                      | 0 (0.00%)                                                        | 3 (100.00%)                                                     | 0.34            |
| Multiple myeloma (N=2)                                     | 0 (0.00%)                                                        | 2 (100.00%)                                                     | 0.44            |
| Adenoid cystic carcinoma (N=2)                             | 0 (0.00%)                                                        | 2 (100.00%)                                                     | 0.44            |
| Merkel cell carcinoma (N=2)                                | 0 (0.00%)                                                        | 2 (100.00%)                                                     | 0.44            |
| Renal cell carcinoma (N=2)                                 | 1 (50.00%)                                                       | 1 (50.00%)                                                      | 0.36            |
| Uterine leiomyosarcoma (N=2)                               | 0 (0.00%)                                                        | 2 (100.00%)                                                     | 0.44            |
| Oligoastrocytoma (N=2)                                     | 1 (50.00%)                                                       | 1 (50.00%)                                                      | 0.36            |
| Mixed glioma (N=1)                                         | 0 (0.00%)                                                        | 1 (100.00%)                                                     | 0.59            |
| Pituitary cancer (N=1)                                     | 0 (0.00%)                                                        | 1 (100.00%)                                                     | 0.59            |
| Basal cell carcinoma (N=1)                                 | 0 (0.00%)                                                        | 1 (100.00%)                                                     | 0.59            |
| Bladder cancer (N=1)                                       | 0 (0.00%)                                                        | 1 (100.00%)                                                     | 0.59            |
| Carcinoid (N=1)                                            | 0 (0.00%)                                                        | 1 (100.00%)                                                     | 0.59            |
| Endometrium (N=1)                                          | 0 (0.00%)                                                        | 1 (100.00%)                                                     | 0.59            |
| Vulvar cancer (N=1)                                        | 0 (0.00%)                                                        | 1 (100.00%)                                                     | 0.59            |
| <b>Types of co-existing genetic aberration<sup>§</sup></b> |                                                                  |                                                                 |                 |
| ZNF (N=19)                                                 | 3 (15.79%)                                                       | 16 (84.21%)                                                     | 0.62            |
| SMAD4 (N=18)                                               | 4 (22.22%)                                                       | 14 (77.78%)                                                     | 0.97            |

\* p-values are from Fisher's exact test.

§ Genetic aberrations with > 5% of frequencies are reported.



Supplemental Table 1. Univariate analysis of CDK4/6 and CDKN2A/B aberrations among diagnoses or other variables with < 20 of cases

¥ Soft tissue/ Sarcoma (N=9):

Ewing sarcoma (N=1), epithelioid sarcoma (N=1), leiomyosarcoma (N=1), myoepithelial carcinoma of soft tissue (N=1), sarcomatoid neoplasm (N=1), pleomorphic rhabdomyosarcoma (N=1), rhabdomyosarcoma of soft tissue (N=1), soft tissue liposarcoma (N=2)

€ Other (N=9):

Anaplastic ependymoma (N=1), malignant peripheral nerve sheath tumor (N=1), malignant fibrous histiocytoma (N=1), ampulla of vater carcinoma (N=1), thymic carcinoma (N=2), metastatic paraganglioma (N=1), peritoneum serous carcinoma (N=1), metastatic hidradenoma (N=1)

¶ Meningioma (N=4): WHO Grade 2 (N=2), WHO Grade 3 (N=2)

Supplemental Table 2. Characteristics of patients with co-existing EGFR and CDK4/6, CDKN2A/B aberration

| Patient ID | Diagnosis                           | Types of aberrant EGFR         | Types of aberrant CDK4/6, CDKN2A/B   |
|------------|-------------------------------------|--------------------------------|--------------------------------------|
| 4          | Breast Cancer                       | EGFR amplification             | CDKN2A/B loss                        |
| 12         | Tongue Cancer                       | EGFR amplification             | CDKN2A R58*                          |
| 164        | Non-small cell carcinoma of lung    | EGFR G719A, L861Q              | CDK4 amplification                   |
| 209        | Astrocytoma and angiocentric glioma | EGFR amplification             | CDKN2A loss                          |
| 220        | Astrocytoma                         | EGFR amplification, EGFRvIII   | CDKN2A/B loss                        |
| 232        | Glioblastoma                        | EGFR amplification, EGFRvIII   | CDKN2A/B loss                        |
| 243        | Glioblastoma                        | EGFR A289V, EGFR amplification | CDK4 amplification                   |
| 257        | Glioblastoma                        | EGFR amplification             | CDK6 amplification                   |
| 259        | Glioblastoma                        | EGFR amplification, EGFRvIII   | CDKN2A/B loss<br>CDK6 amplification, |
| 312        | Esophageal cancer                   | EGFR amplification – equivocal | CDKN2A<br>L16_A17insAT               |
| 317        | Glioblastoma                        | EGFR amplification             | CDKN2A/B loss                        |
| 337        | Oligoastrocytoma                    | EGFR amplification             | CDKN2A/B loss                        |
| 339        | Glioblastoma                        | EGFR amplification, EGFRvIII   | CDKN2A/B loss                        |
| 404        | Esophageal cancer                   | EGFR amplification             | CDK6 amplification                   |
| 459        | Appendiceal cancer                  | EGFR amplification             | CDK6 amplification                   |
| 463        | Oligodendroglioma                   | EGFR amplification             | CDKN2A loss                          |
| 465        | Lung adenocarcinoma                 | EGFR<br>E746_A750del           | CDK6 amplification                   |
| 477        | Glioblastoma                        | EGFR amplification             | CDKN2A/B loss                        |
| 489        | Lung adenocarcinoma                 | EGFR<br>E746_A750del           | CDKN2A/B loss                        |
| 495        | Glioblastoma                        | EGFR amplification, EGFRvIII   | CDKN2A/B loss                        |

Supplemental Table 3. Characteristics of patients with co-existing ARID1A and CDK4/6, CDKN2A/B aberration

| Patient ID | Diagnosis                    | Types of aberrant ARID1A | Types of aberrant CDK4/6, CDKN2A/B |
|------------|------------------------------|--------------------------|------------------------------------|
| 49         | Gastric cancer               | ARID1A P2139fs*62        | CDKN2A loss                        |
| 146        | Thymic carcinoma             | ARID1A R1335*            | CDKN2A/B loss                      |
| 167        | Melanoma                     | ARID1A Y1377*            | CDKN2A R80*                        |
| 183        | Glioblastoma                 | ARID1A L2089P            | CDKN2A/B loss                      |
| 197        | Breast cancer                | ARID1A 253fs*111         | CDK4 amplification                 |
| 221        | Glioblastoma                 | ARID1A A343_A348>A       | CDK4 amplification                 |
| 253        | Cholangiocarcinoma           | ARID1A A1136fs*50        | CDK4 amplification                 |
| 469        | Carcinoma of unknown primary | ARID1A S11fs*91          | CDKN2A V51I                        |

## SUPPLEMENTAL FIGURE LEGEND

### **Supplemental Figure1. Cyclin D- CDK-Rb pathway: A key pathway in G1 cell cycle**

**progression.** CyclinD1 (CCND1) complexes with CDK4/6 leading to phosphorylation of Rb and disassociation of cellular transcription factor E2F from Rb. The latter allows E2F to promote cell cycle progression through G1. CDKN2A/B (CDKN2A = p16; CDKN2B = p15) inhibits CDK4/6, blocking the kinase active site and preventing association with the cyclins. This leads to activation of Rb (active Rb is hypophosphorylated), which in turn negatively regulates E2F and prevents cell cycle entry (causing cell cycle arrest).

CDK4/6 amplification or CDKN2A/B loss would therefore be associated with enhanced cell cycle progression. Inhibitors of CDK4/6 would attenuate the latter effect and may be useful in cancer therapy. However, when Rb is mutated, it can lead to functional inactivation by phosphorylation. Subsequently, E2F transcription factors are liberated and induce cell cycle progression. Hence, Rb mutations would confer resistance to CDK4/6 inhibitors.

Supplemental Figure1. Cyclin D- CDK-Rb pathway: A key pathway in G1 cell cycle progression

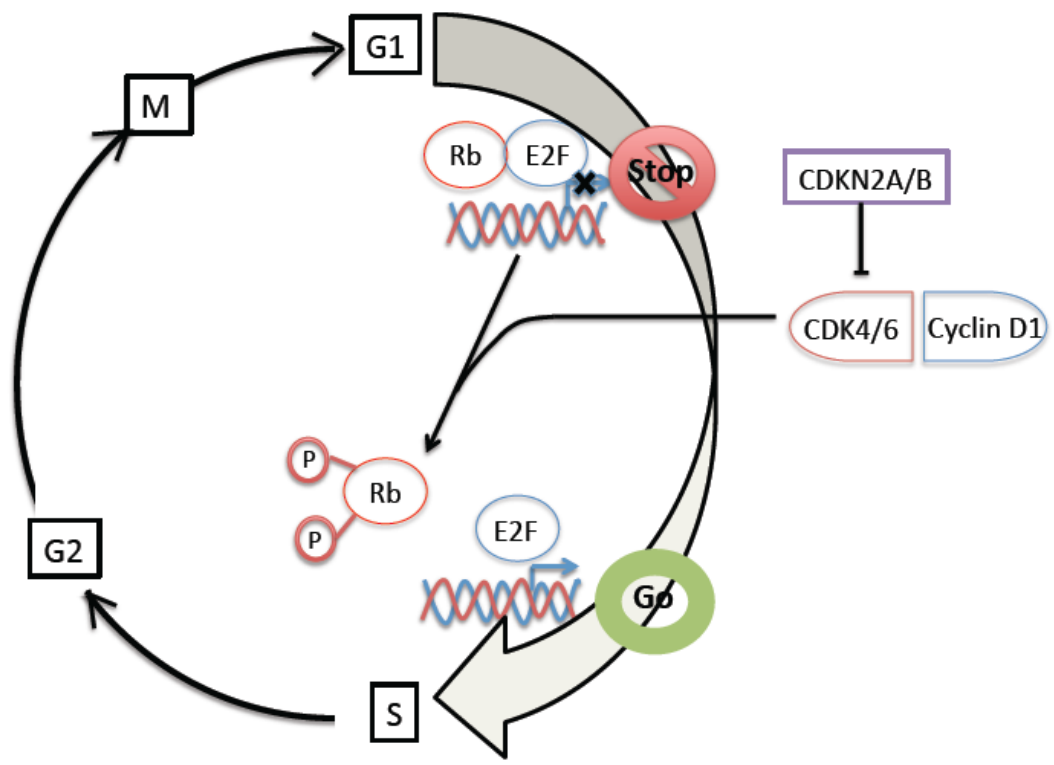

Supplement: kccy-14-08-1014149-s001.pdf [file kccy-14-08-1014149-s001.pdf]
